# Supplementary material
Source: PubMed Central journal article supplement (PMC2597079)
Supplement: NIHMS70217-supplement-Supp_Fig_1.pdf [file NIHMS70217-supplement-Supp_Fig_1.pdf]

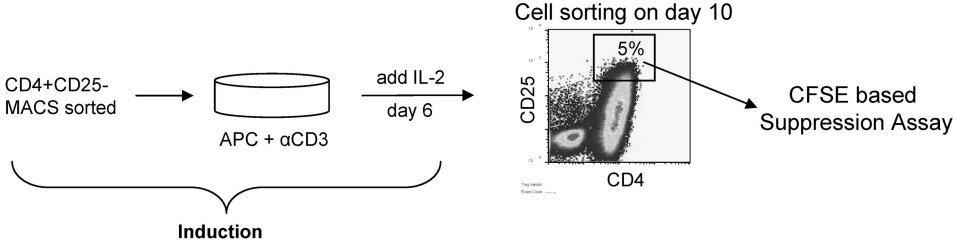

Schematic of adaptive Treg generation and isolation
